# Supplementary material for: Long-term monitoring of Ziphius cavirostris behavior using 3D tracking from fixed hydrophone arrays off Southern California
Source: Research Square preprint supplement (doi:10.21203/rs.3.rs-6348105/v1), 2025-04-25
Supplement: Supplementary file 1 [file ea95ab7bccfcf219ae87a998.docx]

**Supplemental Table 1.** Recording effort summary. Recording start and end dates, as well as position and depth, for each instrument package in each tracking array. Deployment naming convention is region (SOCAL), site, deployment number, instrument position in array (E for east, W for west, S for south). 4-channel systems are denoted by an additional “C4” at the end of the deployment name.

| **Deployment Name** | **Recording Start (UTC)** | **Recording End (UTC)** | **Lat (°N)** | **Lon (°W)** | **Depth (m)** |
| --- | --- | --- | --- | --- | --- |
| SOCAL_W_01_WE_C4 | 30 Jul 2021 | 15 Jan 2022 | 33°32.249’ | 120°14.951’ | 1252 |
| SOCAL_W_01_WS_C4 | 30 Jul 2021 | 17 Jan 2022 | 33°31.941’ | 120°15.254’ | 1250 |
| SOCAL_W_01_WW | 29 Jul 2021 | 22 Jan 2022 | 33°32.384’ | 120°15.489’ | 1378 |
| SOCAL_W_02_WE_C4 | 09 Mar 2022 | 27 May 2022 | 33°32.221’ | 120°14.856’ | 1237 |
| SOCAL_W_02_WS_C4 | 10 Mar 2022 | 28 May 2022 | 33°31.883’ | 120°15.097’ | 1237 |
| SOCAL_W_02_WW | 10 Mar 2022 | 27 Mar 2022 | 33°32.445’ | 120°15.550’ | 1375 |
| SOCAL_W_03_WE_C4 | 27 May 2022 | 14 Oct 2022 | 33°32.249’ | 120°14.855’ | 1242 |
| SOCAL_W_03_WS_C4 | 27 May 2022 | 14 Oct 2022 | 33°31.926’ | 120°15.125’ | 1245 |
| SOCAL_W_03_WW | 27 May 2022 | 14 Oct 2022 | 33°32.470’ | 120°15.553’ | 1384 |
| SOCAL_W_04_WE_C4 | 18 Oct 2022 | 15 Apr 2023 | 33°32.281’ | 120°15.008’ | 1272 |
| SOCAL_W_04_WS_C4 | 19 Oct 2022 | 15 Apr 2023 | 33°31.966’ | 120°15.311’ | 1259 |
| SOCAL_W_04_WW | 17 Oct 2022 | 15 Apr 2023 | 33°32.447’ | 120°15.598’ | 1388 |
| SOCAL_W_05_WE_C4 | 16 Apr 2023 | 24 Sept 2023 | 33°32.368’ | 120°15.068’ | 1301 |
| SOCAL_W_05_WS_C4 | 16 Apr 2023 | 24 Sept 2023 | 33°32.073’ | 120°15.282’ | 1284 |
| SOCAL_W_05_WW | 16 Apr 2023 | 25 Sept 2023 | 33°32.451’ | 120°15.554’ | 1385 |
| SOCAL_H_72_HE | 06 Jun 2021 | 19 Dec 2021 | 32°51.670’ | 119°8.110’ | 1283 |
| SOCAL_H_72_HS_C4 | 01 Jul 2021 | 18 Dec 2021 | 32°51.391’ | 119°8.328’ | 1249 |
| SOCAL_H_72_HW_C4 | 01 Jul 2021 | 23 Oct 2021 | 32°51.727’ | 119°8.556’ | 1263 |
| SOCAL_H_73_HE | 21 Dec 2021 | 23 May 2022 | 32°51.655’ | 119°8.116’ | 1271 |
| SOCAL_H_73_HS_C4 | 20 Dec 2021 | 22 May 2022 | 32°51.376’ | 119°8.337’ | 1246 |
| SOCAL_H_73_HW_C4 | 20 Dec 2021 | 22 May 2022 | 32°51.696’ | 119°8.609’ | 1257 |
| SOCAL_H_74_HE | 23 May 2022 | 15 Oct 2022 | 32°51.654’ | 119°8.118’ | 1272 |
| SOCAL_H_74_HS_C4 | 10 Jun 2022 | 15 Oct 2022 | 32°51.354’ | 119°8.363’ | 1244 |
| SOCAL_H_74_HW_C4 | 10 Jun 2022 | 15 Oct 2022 | 32°51.673’ | 119°8.597’ | 1254 |
| SOCAL_H_75_HE | 16 Oct 2022 | 18 Apr 2023 | 32°51.730’ | 119°8.112’ | 1285 |
| SOCAL_H_75_HS_C4 | 16 Oct 2022 | 17 Apr 2023 | 32°51.359’ | 119°8.354’ | 1248 |
| SOCAL_H_75_HW_C4 | 17 Oct 2022 | 17 Apr 2023 | 32°51.678’ | 119°8.605’ | 1256 |
| SOCAL_E_63_EE_C4 | 15 Mar 2018 | 05 Jul 2018 | 32°39.523’ | 119°28.627’ | 1326 |
| SOCAL_E_63_ES | 15 Mar 2018 | 11 Jul 2018 | 32°39.207’ | 119°29.073’ | 1329 |
| SOCAL_E_63_EW_C4 | 15 Mar 2018 | 05 Jul 2018 | 32°39.388’ | 119°29.289’ | 1330 |
| SOCAL_N_68_NE | 29 Apr 2020 | 15 Oct 2020 | 32°22.185’ | 118°33.875’ | 1298 |
| SOCAL_N_68_NS_C4 | 27 May 2020 | 15 Oct 2020 | 32°21.895’ | 118°34.105’ | 1338 |
| SOCAL_N_68_NW_C4 | 27 May 2020 | 15 Oct 2020 | 32°22.185’ | 118°34.335’ | 1343 |


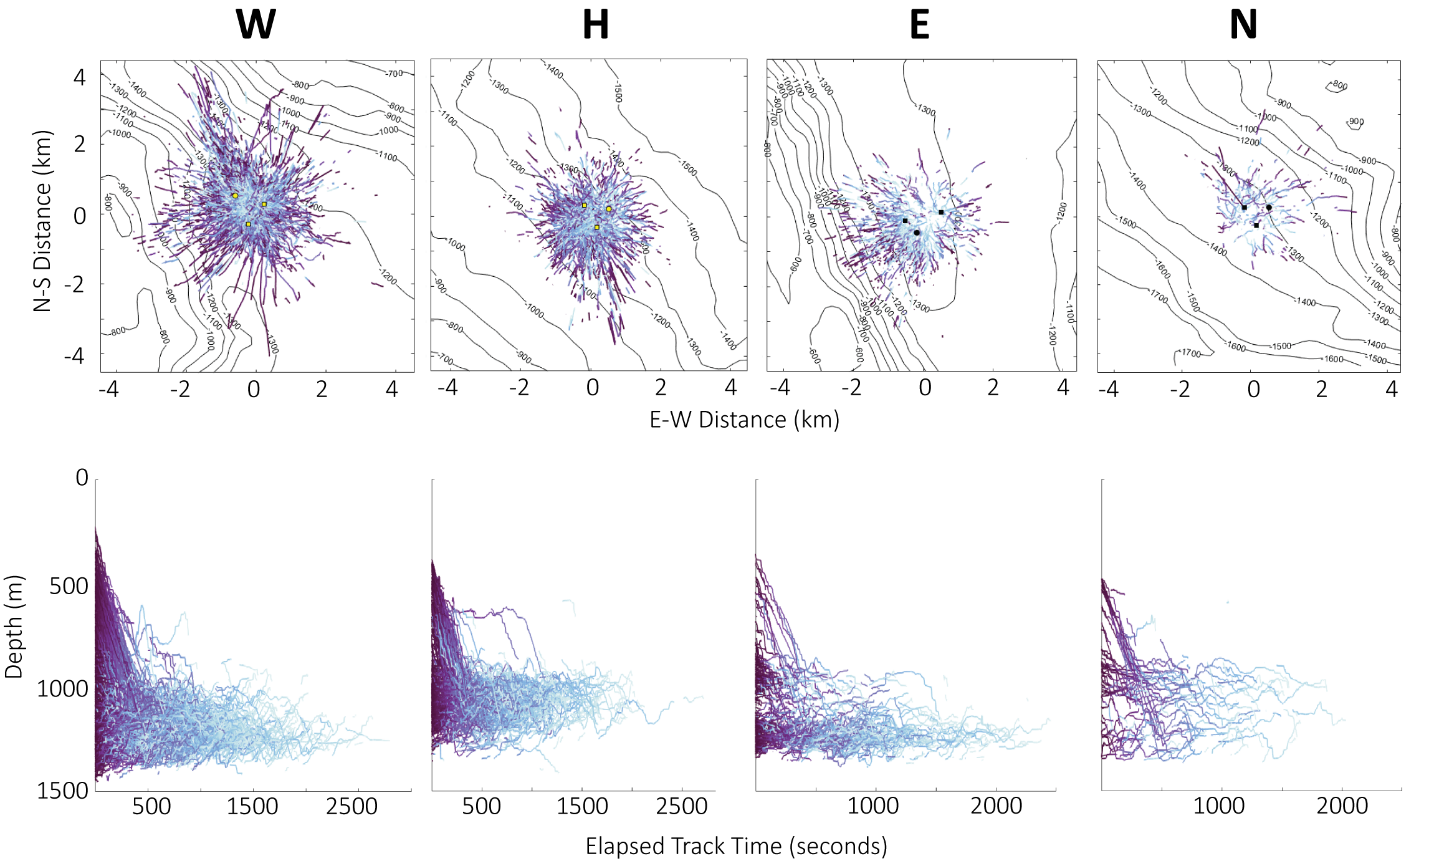


**Supplemental Figure 1.** Spatial view of all tracked whales per site. Columns represent site, and rows represent the XY view (top) and the Z view (bottom). Tracks are colored by normalized track time, with the start of the track in purple and the end of the track in blue. Contour lines every 100 meters indicate bathymetry, square markers represent 4-channel arrays and circle markers represent single-channel hydrophones. Black markers are used at sites with only one deployment, yellow markers are used at sites with multiple deployments. Yellow markers denote the array position of the first deployment; see also Supplemental Figure 3.


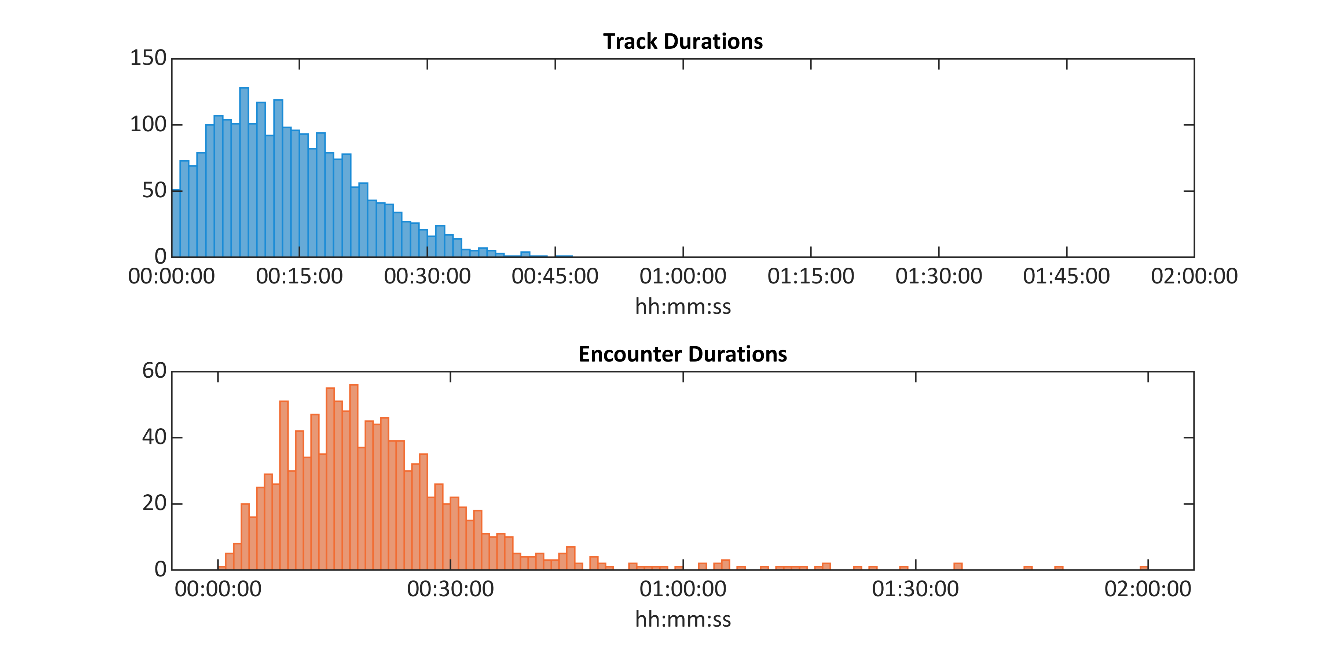
**Supplemental Figure 2.** Track and encounter duration histograms. Track durations represent the time that an individual goose-beaked whale was tracked, and encounter durations represent the time that an encounter of whales was tracked. Detections were considered as part of the same encounter if there were no gaps in detections exceeding 30 minutes.

**Supplemental Table 2.** Dunn post-hoc test p-values from pairwise comparisons for median distance above the seafloor per site.

| **Pairwise Comparison (site)** | **p-value** |
| --- | --- |
| W – H | < 0.001 |
| W – E | < 0.001 |
| W – N | 0.518 |
| H – E | < 0.001 |
| H – N | < 0.001 |
| E – N | < 0.001 |

**Supplemental Table 3.** Dunn post-hoc test p-values from pairwise comparisons for median swim speeds at depth per site.

| **Pairwise Comparison (site)** | **p-value** |
| --- | --- |
| W – H | < 0.001 |
| W – E | < 0.001 |
| W – N | 0.175 |
| H – E | 0.219 |
| H – N | 0.561 |
| E – N | 0.143 |


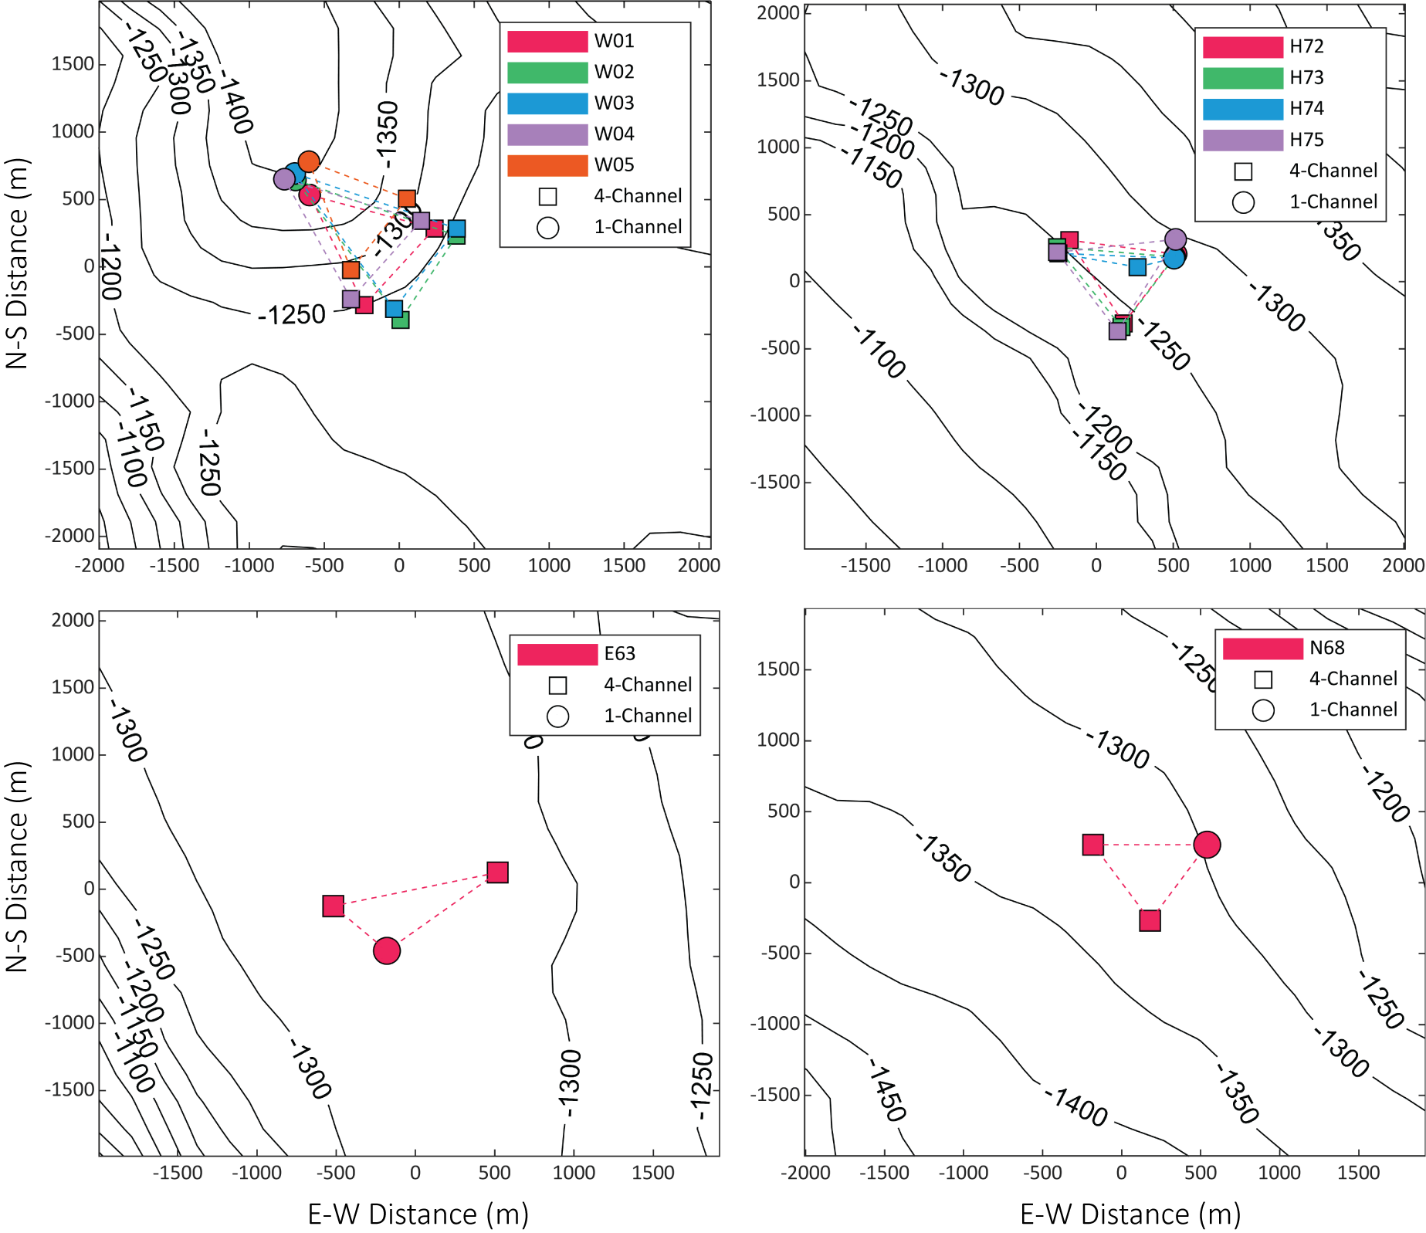


**Supplemental Figure 3.** Instrument positions for all deployments at all sites.


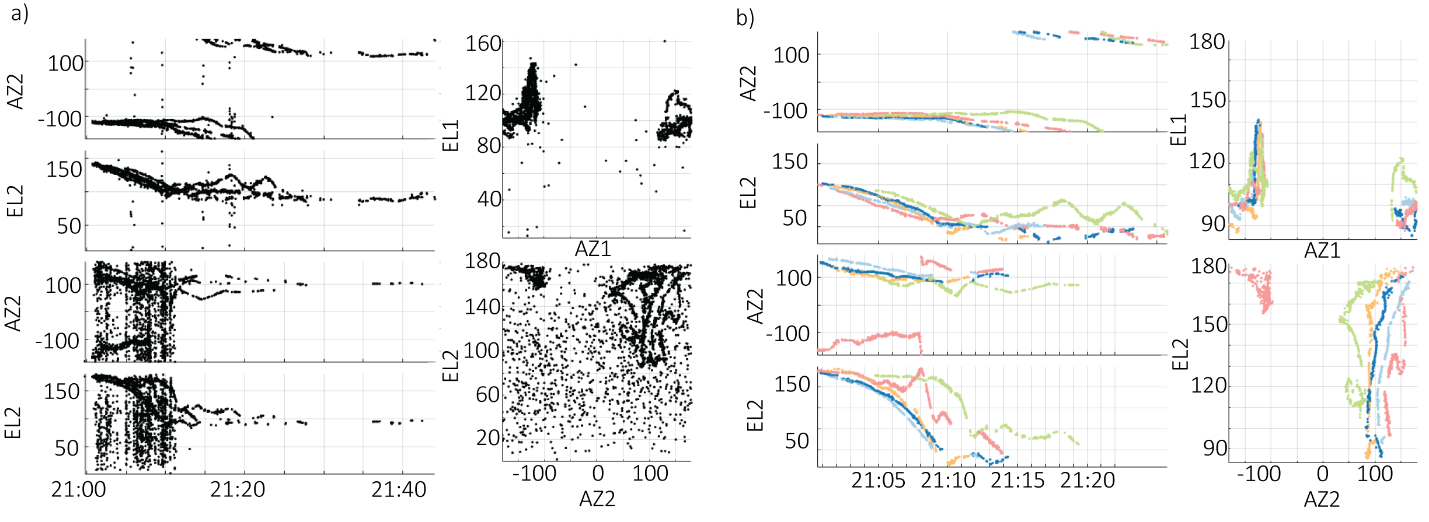


**Supplemental Figure 4.** Before (a) and after (b) track cleaning on the *brushDOA* interface in the *Where’s Whaledo* software package (Snyder et al., 2024). Dots represent detections, black dots are unlabeled and colored dots have been assigned a whale number. This encounter was recorded at site W on September 5th, 2023.


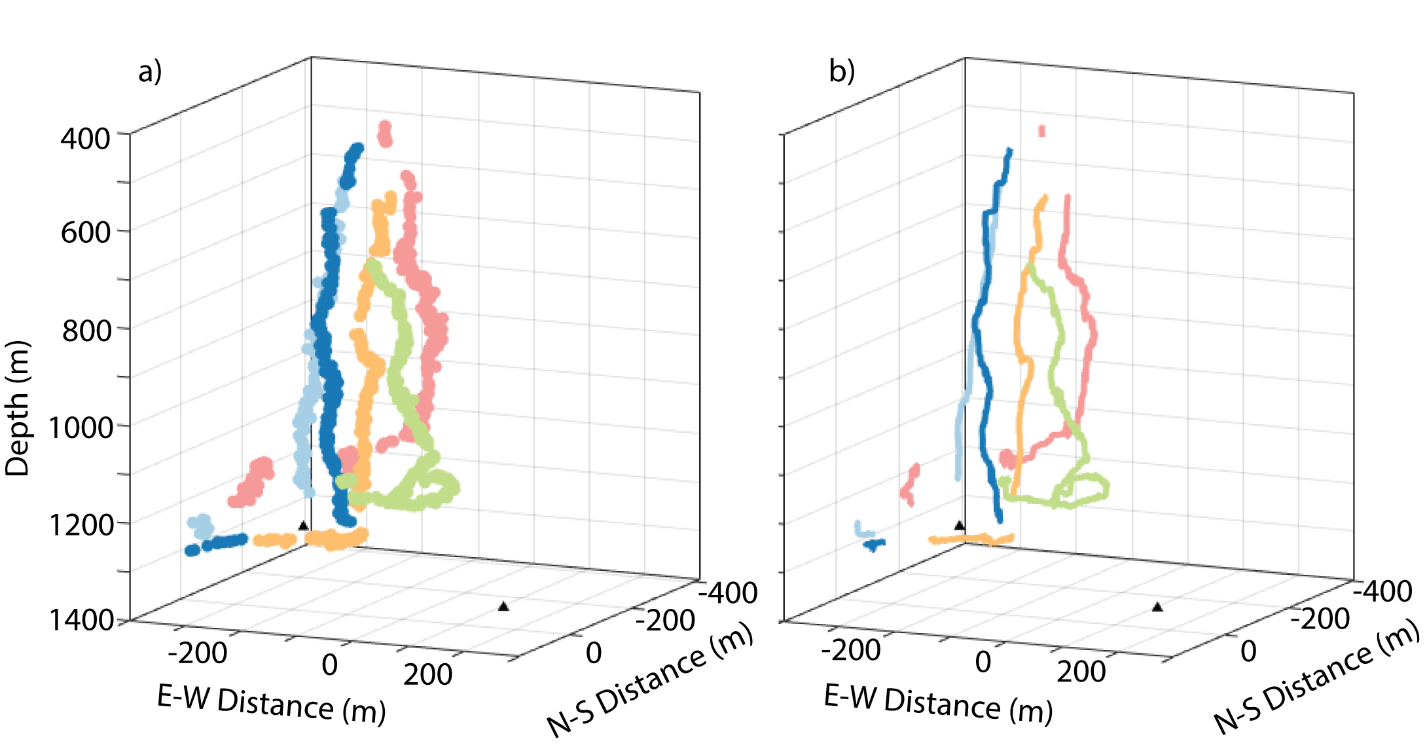


**Supplemental Figure 5.** Track smoothing results for 3D whale tracks. Points represent localized echolocation clicks, colors denote individuals (a). Lines represent smoothed whale locations from the Kalman filter approach, colors denote individuals (b). This encounter was recorded at site W on September 5th, 2023; see Supplemental Figure 4 for the azimuth-elevation view of this encounter.

**Supplemental GIFs.** Tracking results for a few encounters per site. Individual whales are denoted by separate colors. Solid lines indicate tracked positions, dashed lines indicate data gaps. Black or white squares denote the position of the 4-hydrophone arrays. Gray gradient surface represents bathymetry.
